# Supplementary material for: YY1 Silencing Induces 5-Fluorouracil-Resistance and BCL2L15 Downregulation in Colorectal Cancer Cells: Diagnostic and Prognostic Relevance
Source: MDPI journal article supplement (doi:10.3390/ijms22168481), 2021-08-06

## Supplementary Materials

### **YY1 silencing induces 5-Fluorouracil-resistance and BCL2L15 downregulation in colorectal cancer cells: diagnostic and prognostic relevance**

Silvia Vivarelli<sup>1</sup>, Luca Falzone<sup>2\*</sup>, Saverio Candido<sup>1,3</sup>, Benjamin Bonavida<sup>4</sup>, and Massimo Libra<sup>1,3\*</sup>

<sup>1</sup>Department of Biomedical and Biotechnological Sciences, University of Catania, Italy;

<sup>2</sup>Epidemiology Unit, IRCCS Istituto Nazionale Tumori “Fondazione G. Pascale”, Naples, Italy;

<sup>3</sup>Research Center for Prevention, Diagnosis and Treatment of Cancer, University of Catania, Italy.

<sup>4</sup>Department of Microbiology, Immunology and Molecular Genetics, David Geffen School of Medicine, University of California, Los Angeles, California, USA.

\*Co-corresponding authors

**Table S1.** Molecular and pathological features of the CRC cell line panel

| <i>Feature/Cell Line</i> | <b>HT29</b>                                        | <b>SW620</b>                                       | <b>HCT116</b>                    | <b>Caco2</b>                                |
|--------------------------|----------------------------------------------------|----------------------------------------------------|----------------------------------|---------------------------------------------|
| <i>Organ</i>             | Colon                                              | Colon                                              | Colon ascendens                  | Colon                                       |
| <i>Disease</i>           | Colorectal adenocarcinoma                          | Colorectal adenocarcinoma                          | Colorectal carcinoma             | Colorectal adenocarcinoma                   |
| <i>Patient</i>           | 44-Year-old female                                 | 51-Year-old male                                   | 48-Year-old male                 | 48-Year-old male                            |
| <i>Stage</i>             | Dukes' C                                           | Dukes' C                                           | Dukes' D                         | Dukes' B                                    |
| <i>Derived from</i>      | Primary tumor                                      | Lymph node metastasis                              | Primary tumor                    | nd                                          |
| <i>MSI status</i>        | MSS                                                | MSS                                                | MSI                              | MSS                                         |
| <i>CIMP panel 1</i>      | +                                                  | +                                                  | +                                | +                                           |
| <i>CIMP panel 2</i>      | +                                                  | –                                                  | +                                | –                                           |
| <i>CIN</i>               | +                                                  | 46                                                 | –                                | 48                                          |
| <i>APC mut 1</i>         | p.E853* (substitution - nonsense)                  | p.Q1338* (substitution - nonsense)                 | p.?                              | p.Q1367* (substitution - nonsense)          |
| <i>APC mut 2</i>         | p.T1556Nfs*3 (insertion - frameshift)              | p.?                                                | p.?                              | p.?                                         |
| <i>CTNNB1 mut 1</i>      | wt                                                 | wt                                                 | p.S45del (deletion - in frame)   | p.G245A                                     |
| <i>CTNNB1 mut 2</i>      | wt                                                 | wt                                                 | p.?                              | p.?                                         |
| <i>TP53 mut 1</i>        | p.R273H (substitution - missense) Gain of function | p.R273H (substitution - missense) Gain of function | wt                               | p.Glu204Ter (substitution - nonsense - KO ) |
| <i>TP53 mut 2</i>        | p.?                                                | p.P309S                                            | wt                               | p.Glu204Ter (substitution - nonsense - KO)  |
| <i>KRAS mut 1</i>        | wt                                                 | p.G12V (substitution - missense)                   | p.G13D (substitution - missense) | wt                                          |
| <i>KRAS mut 2</i>        | wt                                                 | p.?                                                | p.?                              | wt                                          |
| <i>BRAF mut 1</i>        | p.Val600Glu (substitution - missense)              | wt                                                 | p.Ser45del                       | wt                                          |
| <i>BRAF mut 2</i>        | p.?                                                | wt                                                 | p.?                              | wt                                          |
| <i>PIK3CA mut 1</i>      | p.Pro449Thr (substitution - missense)              | wt                                                 | p.His1047Arg                     | wt                                          |
| <i>PIK3CA mut 2</i>      | p.?                                                | wt                                                 | p.?                              | wt                                          |
| <i>SMAD4 mut 1</i>       | p.Q311* (substitution - nonsense)                  | p.?                                                | nd                               | p.D351H (substituion - missense)            |
| <i>SMAD4 mut 2</i>       | p.?                                                | p.?                                                | nd                               | p.?                                         |
| <i>CDKN2A mut 1</i>      | nd                                                 | nd                                                 | p.Arg24fs*20                     | nd                                          |
| <i>CDKN2A mut 2</i>      | nd                                                 | nd                                                 | p.Glu74fs*15                     | nd                                          |

**Table S2.** Whole Transcription Factors ChIP-seq binding-clusters within BCL2L15 promoter/enhancer (all experiments)

| Experiment Name                      | Tissue                                            | Binding Score | co-IP TF ID |
|--------------------------------------|---------------------------------------------------|---------------|-------------|
| ATF2 IP - GM12878 cells              | lymphoid lineage, B lymphocytes, GM12878 cells    | 92            | ATF2        |
| ATF3 IP                              | epithelium, HCT116 cells                          | 134           | ATF3        |
| ATF3 IP   CAMPTO                     | epithelium, HCT116 cells                          | 311           | ATF3        |
| BATF IP - GM12878 cells              | lymphoid lineage, B lymphocytes, GM12878 cells    | 182           | BATF        |
| BCL11A IP - GM12878 cells            | lymphoid lineage, B lymphocytes, GM12878 cells    | 151           | BCL11A      |
| BHLHE40 IP - GM12878 cells           | lymphoid lineage, B lymphocytes, GM12878 cells    | 117           | BHLHE40     |
| CDX2 IP   125DVD3                    | epithelium, LS180 cells                           | 94            | CDX2        |
| CDX2 IP                              | epithelium, LS180 cells                           | 126           | CDX2        |
| CEBPB IP - K562 cells                | myeloid lineage, myeloblasts, CML, K562 cells     | 141           | CEBPB       |
| CEBPB IP                             | multipotent, MSCs                                 | 166           | CEBPB       |
| CEBPB IP                             | myeloid lineage, macrophages, MV-4-11 cells       | 180           | CEBPB       |
| CEBPB IP - HCT116 cells              | epithelium, HCT116 cells                          | 186           | CEBPB       |
| CEBPB IP - MCF7 cells                | epithelium, MCF-7 cells                           | 209           | CEBPB       |
| CEBPB ChIP-Seq - K562                | myeloid lineage, myeloblasts, CML, K562 cells     | 361           | CEBPB       |
| CEBPB IP                             | multipotent, MSCs                                 | 419           | CEBPB       |
| CEBPB IP                             | multipotent, MSCs                                 | 486           | CEBPB       |
| E2F3 IP                              | epithelium, LoVo cells                            | 155           | E2F3        |
| EBF1 IP - GM12878 cells              | lymphoid lineage, B lymphocytes, GM12878 cells    | 103           | EBF1        |
| ELF3 IP   KLF5 KO                    | duct, epithelium, CFPAC-1 cells                   | 273           | ELF3        |
| ELF3 IP                              | duct, epithelium, CFPAC-1 cells                   | 586           | ELF3        |
| ELF3 IP                              | duct, epithelium, CFPAC-1 cells                   | 731           | ELF3        |
| EOMES IP - Rep 3                     | pluripotent, ESCs, HUES64 cells                   | 266           | EOMES       |
| ETS1 IP                              | lymphoid lineage, lymphoblasts, ALL, CUTLL1 cells | 183           | ETS1        |
| ETV5 IP                              | epithelium, LoVo cells                            | 146           | ETV5        |
| FOSL1 IP - HCT116 cells              | epithelium, HCT116 cells                          | 524           | FOSL1       |
| FOXA1 ChIP-Seq - Rep 1               | epithelium, ZR-75-1 cells                         | 105           | FOXA1       |
| DHT   FOXA1 ChIP-Seq                 | epithelium, LNCaP cells                           | 110           | FOXA1       |
| FOXA1 ChIP-Seq                       | epithelium, LNCaP cells                           | 111           | FOXA1       |
| FOXA1 IP - ES D7                     | pluripotent, ESCs, Cyt49 cells                    | 136           | FOXA1       |
| FOXA1 ChIP-Seq                       | epithelium, LNCaP-abl cells                       | 156           | FOXA1       |
| FOXA1 IP - Rep 1                     | pluripotent, ESCs, HUES64 cells                   | 164           | FOXA1       |
| CREB1 siRNA   FOXA1 ChIP-Seq - Rep 1 | epithelium, LNCaP-abl cells                       | 193           | FOXA1       |
| FOXA1 ChIP-Seq - LNCaP-abl           | epithelium, LNCaP-abl cells                       | 194           | FOXA1       |
| FOXA1 IP - T47D cells                | epithelium, T47D cells                            | 201           | FOXA1       |
| DEX   FOXA1 ChIP-Seq - Rep 2         | epithelium, ZR-75-1 cells                         | 221           | FOXA1       |
| FOXA1 ChIP-Seq - Rep 2               | epithelium, LNCaP-abl cells                       | 224           | FOXA1       |
| CREB1 siRNA   FOXA1 ChIP-Seq - Rep 2 | epithelium, LNCaP-abl cells                       | 244           | FOXA1       |
| FOXA1 IP                             | duct, epithelium, CFPAC-1 cells                   | 295           | FOXA1       |
| FOXA1 IP                             | duct, epithelium, CFPAC-1 cells                   | 308           | FOXA1       |
| FOXA1 ChIP-Seq                       | epithelium, LNCaP cells                           | 359           | FOXA1       |

|                                     |                                                   |     |       |
|-------------------------------------|---------------------------------------------------|-----|-------|
| <b>FOXA1 IP - Rep 5</b>             | pluripotent, ESCs, HUES64 cells                   | 540 | FOXA1 |
| <b>FOXA2 IP - Rep 5</b>             | pluripotent, ESCs, HUES64 cells                   | 193 | FOXA2 |
| <b>FOXA2 IP - Rep 1</b>             | pluripotent, ESCs, HUES64 cells                   | 289 | FOXA2 |
| <b>FOXA2 IP - Rep 1</b>             | endodermal cells                                  | 398 | FOXA2 |
| <b>FOXM1 IP - ECC1 cells</b>        | endometrium, epithelium, ECC-1 cells              | 139 | FOXM1 |
| <b>FOXP1 IP</b>                     | epithelium, LoVo cells                            | 115 | FOXP1 |
| <b>GABPA IP - Jurkat, Rep 1</b>     | lymphoid lineage, T lymphocytes, Jurkat           | 161 | GABPA |
| <b>FOXA1 KD   GATA2 ChIP-Seq</b>    | epithelium, LNCaP cells                           | 179 | GATA2 |
| <b>17BE2   GATA3 ChIP-Seq</b>       | epithelium, MCF-7 cells                           | 90  | GATA3 |
| <b>GATA3 IP - T47D cells</b>        | epithelium, T47D cells                            | 158 | GATA3 |
| <b>GATA3 IP - SK-N-SH cells</b>     | other, neuroblastoma cells, SK-N-SH cells         | 198 | GATA3 |
| <b>GATA4 IP - Rep 11</b>            | pluripotent, ESCs, HUES64 cells                   | 118 | GATA4 |
| <b>GATA4 IP - Rep 8</b>             | pluripotent, ESCs, HUES64 cells                   | 151 | GATA4 |
| <b>GATA4 IP - Rep 10</b>            | pluripotent, ESCs, HUES64 cells                   | 164 | GATA4 |
| <b>GATA4 IP - AGS</b>               | epithelium, AGS cells                             | 186 | GATA4 |
| <b>GATA4 IP - Rep 9</b>             | pluripotent, ESCs, HUES64 cells                   | 187 | GATA4 |
| <b>HNF1B IP</b>                     | duct, epithelium, CFPAC-1 cells                   | 416 | HNF1B |
| <b>HOXA4 IP</b>                     | epithelium, LoVo cells                            | 133 | HOXA4 |
| <b>IRF1 IP</b>                      | duct, epithelium, CFPAC-1 cells                   | 180 | IRF1  |
| <b>IRF1 IP</b>                      | epithelium, LoVo cells                            | 323 | IRF1  |
| <b>IRF1 IP - Rep 3</b>              | lymphoid lineage, T lymphocytes, CD4+             | 373 | IRF1  |
| <b>JUN IP</b>                       | epithelium, LoVo cells                            | 134 | JUN   |
| <b>JUN IP - Rep 2</b>               | epithelium, MDA-MB-231 cells                      | 184 | JUN   |
| <b>JUN IP - Rep 1</b>               | epithelium, MDA-MB-231 cells                      | 329 | JUN   |
| <b>JUND IP</b>                      | smooth muscle, whole                              | 189 | JUND  |
| <b>JUND IP - HCT116 cells</b>       | epithelium, HCT116 cells                          | 766 | JUND  |
| <b>KLF5 IP - KATOIII</b>            | epithelium, KATO III cells                        | 125 | KLF5  |
| <b>KLF5 IP</b>                      | duct, epithelium, CFPAC-1 cells                   | 383 | KLF5  |
| <b>MAX IP - HCT116 cells</b>        | epithelium, HCT116 cells                          | 172 | MAX   |
| <b>MYB IP - Jurkat, Rep 3</b>       | lymphoid lineage, T lymphocytes, Jurkat           | 135 | MYB   |
| <b>MYB IP - Jurkat, Rep 1</b>       | lymphoid lineage, T lymphocytes, Jurkat           | 194 | MYB   |
| <b>MYB IP - Jurkat, Rep 5</b>       | lymphoid lineage, T lymphocytes, Jurkat           | 217 | MYB   |
| <b>MYB IP - Jurkat, Rep 4</b>       | lymphoid lineage, T lymphocytes, Jurkat           | 529 | MYB   |
| <b>NFYB IP - GM12878 cells</b>      | lymphoid lineage, B lymphocytes, GM12878 cells    | 214 | NFYB  |
| <b>OTX2 IP - Rep 8</b>              | pluripotent, ESCs, HUES64 cells                   | 165 | OTX2  |
| <b>OTX2 IP - Rep 6</b>              | pluripotent, ESCs, HUES64 cells                   | 197 | OTX2  |
| <b>SP1 IP - GM12878 cells</b>       | lymphoid lineage, B lymphocytes, GM12878 cells    | 79  | SP1   |
| <b>SP1 IP - HCT116 cells</b>        | epithelium, HCT116 cells                          | 545 | SP1   |
| <b>SPI1 IP - HL-60 cells, Rep 4</b> | myeloid lineage, promyelocytes, APL, HL-60 cells  | 109 | SPI1  |
| <b>SPI1 IP - U-937 cells, Rep 1</b> | myeloid lineage, monocytes, U-937 cells           | 180 | SPI1  |
| <b>SPI1 IP   RUNX1 KD</b>           | myeloid lineage, myeloblasts, AML, kasumi-1 cells | 204 | SPI1  |
| <b>SPI1 IP - U-937 cells, Rep 4</b> | myeloid lineage, monocytes, U-937 cells           | 235 | SPI1  |
| <b>SPI1 IP - GM12891 cells</b>      | lymphoid lineage, B lymphocytes, GM12891 cells    | 259 | SPI1  |
| <b>SPI1 IP</b>                      | myeloid lineage, macrophages, unspecified         | 264 | SPI1  |
| <b>SPI1 IP</b>                      | myeloid lineage, myeloblasts, AML, kasumi-1 cells | 310 | SPI1  |

|                                  |                                                  |      |        |
|----------------------------------|--------------------------------------------------|------|--------|
| <b>SPI1 IP</b>                   | myeloid lineage, macrophages, unspecified        | 339  | SPI1   |
| <b>SPI1 IP - GM12878 cells</b>   | lymphoid lineage, B lymphocytes, GM12878 cells   | 342  | SPI1   |
| <b>SPI1 IP - HL cells</b>        | myeloid lineage, promyelocytes, APL, HL-60 cells | 379  | SPI1   |
| <b>SPI1 IP</b>                   | myeloid lineage, macrophages, unspecified        | 643  | SPI1   |
| <b>SPI1 IP</b>                   | myeloid lineage, macrophages, unspecified        | 849  | SPI1   |
| <b>SPI1 IP</b>                   | myeloid lineage, macrophages, unspecified        | 1046 | SPI1   |
| <b>SPI1 IP</b>                   | myeloid lineage, macrophages, unspecified        | 1133 | SPI1   |
| <b>SPI1 IP</b>                   | myeloid lineage, macrophages, unspecified        | 1197 | SPI1   |
| <b>SRF IP - HCT116 cells</b>     | epithelium, HCT116 cells                         | 99   | SRF    |
| <b>TAL1 IP</b>                   | epithelium, LoVo cells                           | 127  | TAL1   |
| <b>TCF12 IP - ECC1 cells</b>     | endometrium, epithelium, ECC-1 cells             | 142  | TCF12  |
| <b>TCF12 IP - SK-N-SH cells</b>  | other, neuroblastoma cells, SK-N-SH cells        | 207  | TCF12  |
| <b>TEAD4 IP - HCT116 cells</b>   | epithelium, HCT116 cells                         | 279  | TEAD4  |
| <b>TEAD4 IP - ECC1 cells</b>     | endometrium, epithelium, ECC-1 cells             | 390  | TEAD4  |
| <b>ZNF384 IP - GM12878 cells</b> | lymphoid lineage, B lymphocytes, GM12878 cells   | 81   | ZNF384 |

**Table S3.** GEO DataSets features, normality and correlation analyses

| <b>GEO Dataset Name</b> | <b>GSE ID</b> | <b>Year</b> | <b>Patients</b> | <b>YY1 Normality test</b> | <b>BCL2L15 Normality test</b> | <b>Pearson R</b> | <b><i>Pearson P</i></b> | <b>Spearman R</b> | <b><i>Spearman P</i></b> |
|-------------------------|---------------|-------------|-----------------|---------------------------|-------------------------------|------------------|-------------------------|-------------------|--------------------------|
| <b>EXPO</b>             | GSE2109       | 2005        | 315             | 0.4169 (Y)                | <0.0001 (N)                   | 0.0439           | <i>0.4368</i>           | 0.0408            | <i>0.4710</i>            |
| <b>Watanabe</b>         | GSE4554       | 2006        | 84              | <0.0001 (N)               | <0.0001 (N)                   | 0.1820           | <i>0.0976</i>           | 0.1949            | <i>0.0756</i>            |
| <b>Marra</b>            | GSE8671       | 2007        | 32              | 0.6751 (Y)                | 0.1307 (Y)                    | -0.1260          | <i>0.4847</i>           | -0.0955           | <i>0.6029</i>            |
| <b>Jorissen</b>         | GSE13294      | 2009        | 155             | 0.0747 (Y)                | <0.0001 (N)                   | 0.0052           | <i>0.9490</i>           | 0.0211            | <i>0.7936</i>            |
| <b>Smith</b>            | GSE17538      | 2009        | 232             | <0.0001 (N)               | 0.3461 (Y)                    | 0.0577           | <i>0.3815</i>           | 0.0723            | <i>0.2722</i>            |
| <b>Sieber</b>           | GSE14333      | 2010        | 289             | 0.0025 (N)                | <0.0001 (N)                   | 0.0082           | <i>0.8890</i>           | 0.0206            | <i>0.7270</i>            |
| <b>Sugihara</b>         | GSE21510      | 2011        | 148             | 0.8457 (Y)                | <0.0001 (N)                   | -0.0104          | <i>0.8997</i>           | 0.0157            | <i>0.8497</i>            |
| <b>Yagi</b>             | GSE28702      | 2011        | 83              | 0.7817 (Y)                | 0.339 (Y)                     | 0.0096           | <i>0.9312</i>           | 0.0905            | <i>0.4159</i>            |
| <b>Olschwang</b>        | GSE37892      | 2012        | 130             | 0.0122 (N)                | 0.1917 (Y)                    | 0.1169           | <i>0.1853</i>           | 0.1923            | <i>0.0284</i>            |
| <b>Wessels</b>          | GSE35896      | 2013        | 62              | 0.2448 (Y)                | <0.0001 (N)                   | -0.1213          | <i>0.3475</i>           | -0.0368           | <i>0.7766</i>            |
| <b>Clary</b>            | GSE41568      | 2016        | 133             | 0.6228 (Y)                | 0.0052 (N)                    | 0.1024           | <i>0.2409</i>           | 0.1232            | <i>0.1578</i>            |
| <b>Sieber</b>           | GSE75316      | 2016        | 58              | 0.6715 (Y)                | <0.0001 (N)                   | 0.0641           | <i>0.6329</i>           | -0.0305           | <i>0.8200</i>            |

**Table S4.** Primers used in the RT-PCR experiments

| <i>GENE ID</i>   | <b>Primer Forward</b>     | <b>Primer Reverse</b>     | <b>bp</b> |
|------------------|---------------------------|---------------------------|-----------|
| <i>BCL2</i>      | TGAACTGGGGGAGGATTGTG      | CGTACAGTTCCACAAAGGCA      | 183       |
| <i>BCL2L1 XS</i> | AGCTTTGAACAGGATACTTTTGTGG | GGTGGGAGGGTAGAGTGGAT      | 183       |
| <i>BCL2L1 XL</i> | CTGTGCGTGGAAGCGTAGA       | GCTGCTGCATTGTTCCCATAG     | 155       |
| <i>BCL2L2</i>    | CACCCAGGTCTCCGATGAAC      | GCTGTGAACTCCGCCAG         | 210       |
| <i>BCL2L3</i>    | TTTCAGCGACGGCGTAACA       | CAAACCCATCCCAGCCTCTTT     | 189       |
| <i>BCL2L4</i>    | CCCCGAGAGGTCTTTTCCG       | TGGTTCTGATCAGTTCCGGC      | 145       |
| <i>BCL2L7</i>    | GATCCCGGCAGGCTGATCC       | GTAGCTGCGGAAAACCTCCT      | 156       |
| <i>BCL2L8</i>    | CTTAAGAAGGGACTTCCTCGC     | GTGGAGTTTCGGGATGTGGA      | 163       |
| <i>BCL2L15</i>   | ACCTGGTGTGCTCAGGATTC      | TCCAGATTTTCCCAACCTCCC     | 194       |
| <i>BIRC3</i>     | TCTGGGCAGCAGGTTTACAA      | GCATTCTTTGGATAGTAAAACACCA | 191       |
| <i>BIRC4</i>     | TGTCCTGGCGCGAAAAGGT       | CGTGCCAGTGTTGATGCTGA      | 190       |
| <i>BIRC5</i>     | CAAGGACCACCGCATCTCTA      | TGTCCTCTATGGGGTCGTC       | 189       |
| <i>BIK</i>       | CCGCCAGAGGAGAAATGTCTGA    | TCCTCCATAGGGTCCAGGTC      | 145       |
| <i>TP53</i>      | CCCCTCCTCAGCATCTTATCC     | GTACAGTCAGAGCCAACCTCAG    | 124       |
| <i>YY1</i>       | GAGAGAACTCACCTCCTGAT      | GGCTTCTCTCCAGTATGAAC      | 325       |
| <i>GAPDH</i>     | AGAAGGCTGGGGCTCATTTG      | AGGGGCCATCCACAGTCTTC      | 258       |

**Table S5.** Antibodies used for immunoblot analyses

| <b>Antibody</b>                                         | <b>Dilution in blocking buffer</b> | <b>Brand</b>                                                | <b>ID</b> |
|---------------------------------------------------------|------------------------------------|-------------------------------------------------------------|-----------|
| <b>anti-YY1</b>                                         | 1:1 000 dilution                   | Cell Signaling Technology, Danvers, MA, USA                 | CST-2185  |
| <b>anti-Bfk</b>                                         | 1:1 000 dilution                   | Abcam, Cambridge, UK                                        | Ab-18493  |
| <b>anti-<math>\beta</math>-Actin</b>                    | 1:10 000 dilution                  | Sigma-Aldrich, St. Louis, MO, USA                           | A1978     |
| <b>anti-GAPDH</b>                                       | 1:1 000 dilution                   | Santa Cruz Biotech,Dallas, TX, USA                          | sc-137179 |
| <b>anti-cleaved-Caspase-3</b>                           | 1:1 000 dilution                   | Cell Signaling Technology, Danvers, MA, USA                 | CST-9664  |
| <b>anti-Flag-M2</b>                                     | 1:1 000 dilution                   | Sigma-Aldrich, St. Louis, MO, USA                           | F1804     |
| <b>Goat Anti-Rabbit IgG Antibody, Fc, HRP conjugate</b> | 1:3 000 dilution                   | Chemicon International, Fisher Scientific, Waltham, MA, USA | AP156P    |
| <b>Goat Anti-Mouse IgG Antibody, Fc, HRP conjugate</b>  | 1:3 000 dilution                   | Chemicon International, Fisher Scientific, Waltham, MA, USA | AP127P    |



**Figure S1.** Sq-RT-PCR densitometry analysis of YY1 putative transcriptional targets in the apoptotic pathway in CRC cells panel (HCT-116, Caco-2, HT-29 SW620). Signals are normalized with GAPDH, used as housekeeping. Values are presented as Mean  $\pm$  SD.

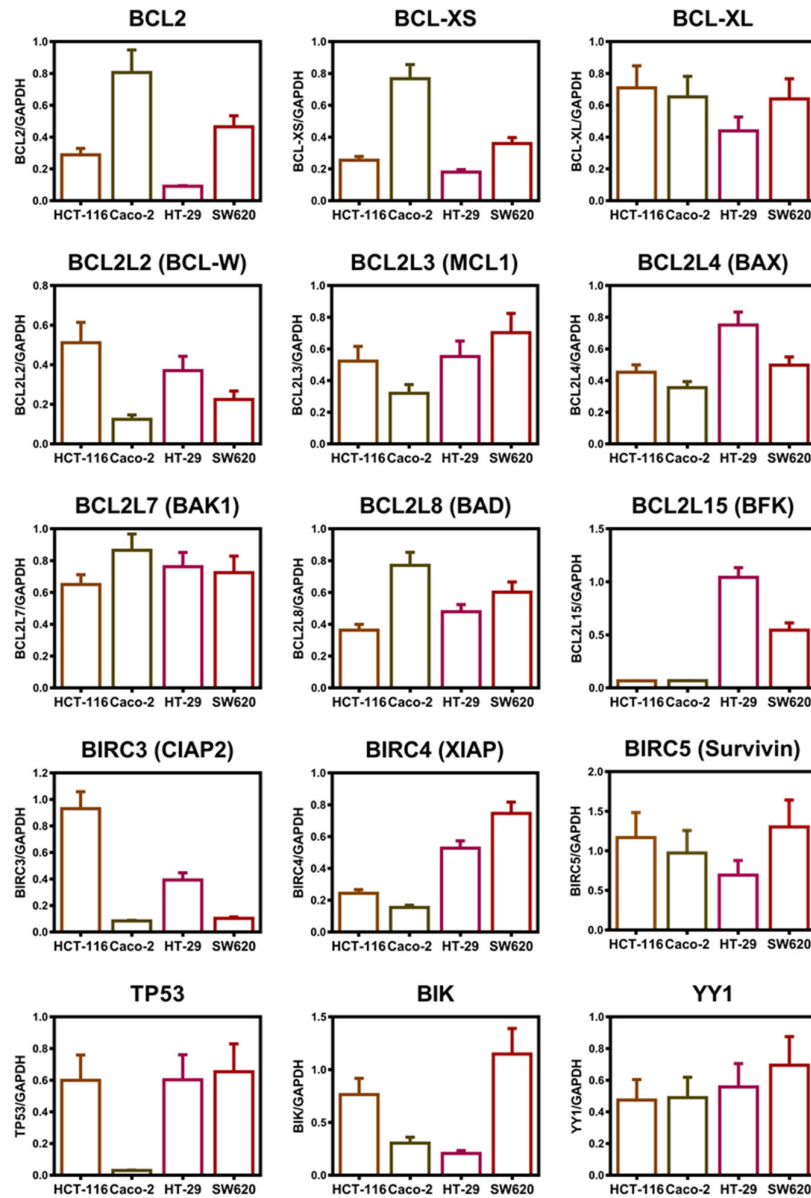

**Figure S2.** Sq-RT-PCR densitometry analysis of YY1 putative transcriptional targets in the apoptotic pathway in HT-29 cells (CTRL, KD-01, KD-02). Signals are normalized with GAPDH, used as housekeeping. Values are presented as Mean  $\pm$  SD. \* $P < 0.05$ ; \*\* $P < 0.01$ ; \*\*\* $P < 0.001$ ; \*\*\*\* $P < 0.0001$ .

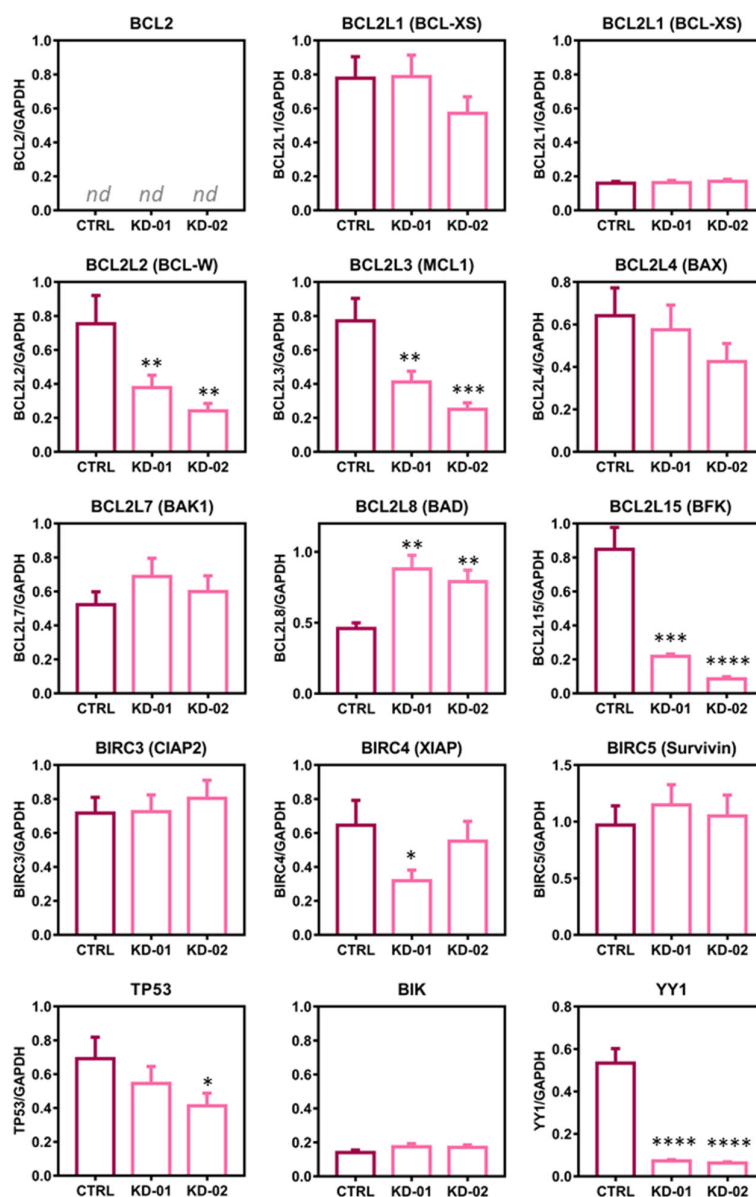

**Figure S3.** Sq-RT-PCR densitometry analysis of YY1 putative transcriptional targets in the apoptotic pathway in SW620 cells (CTRL, KD-01, KD-02). Signals are normalized with GAPDH, used as housekeeping. Values are presented as Mean  $\pm$  SD. \* $P < 0.05$ ; \*\* $P < 0.01$ ; \*\*\* $P < 0.001$ .

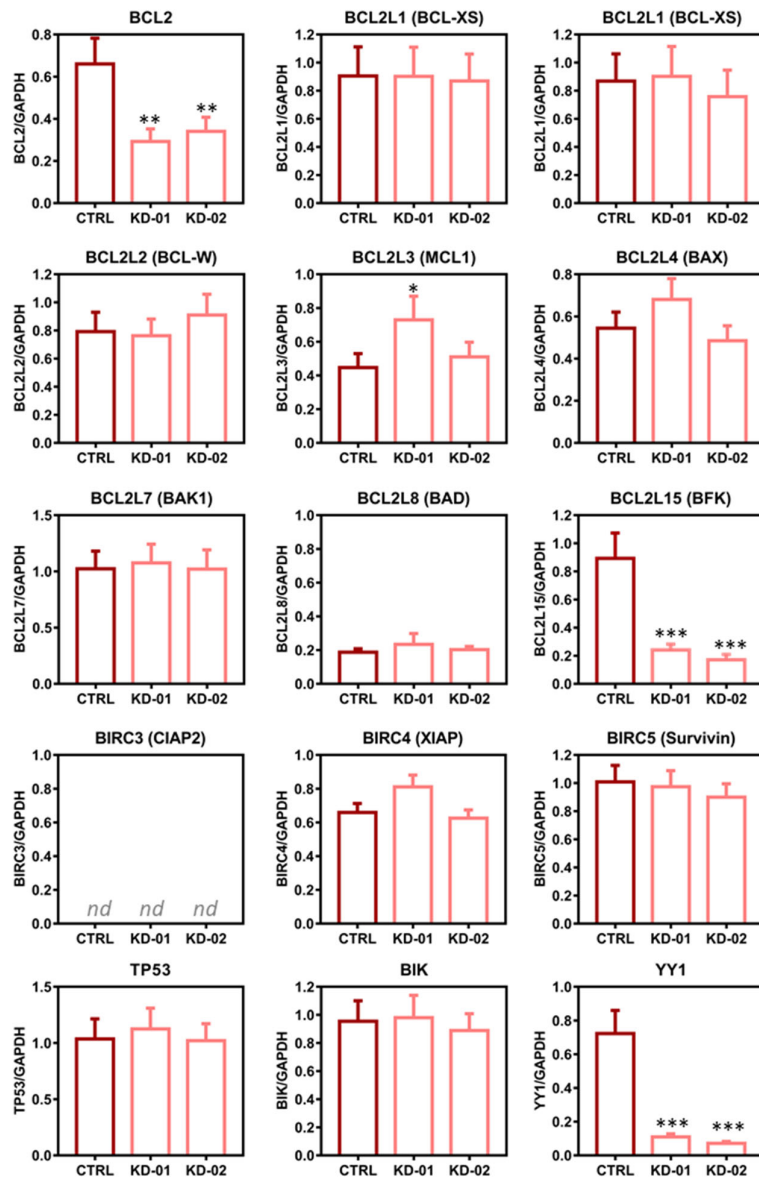

**Figure S4.** Whole Transcription Factors ChIP-seq binding-clusters within BCL2L15 regulatory region ( $\pm 10$ Kb from Transcription Starting Site, TSS). Binding score arbitrary units (from 0 to 1200). Highlighted blue: Transcription factor class, Black: Transcription factor subclass, Light grey: Transcription factor gene name. Each red dot is an independent ChIP-seq experiment and indicates the intersection between the specific transcription factor gene name and its relative binding score to the BCL2L15 regulatory region.

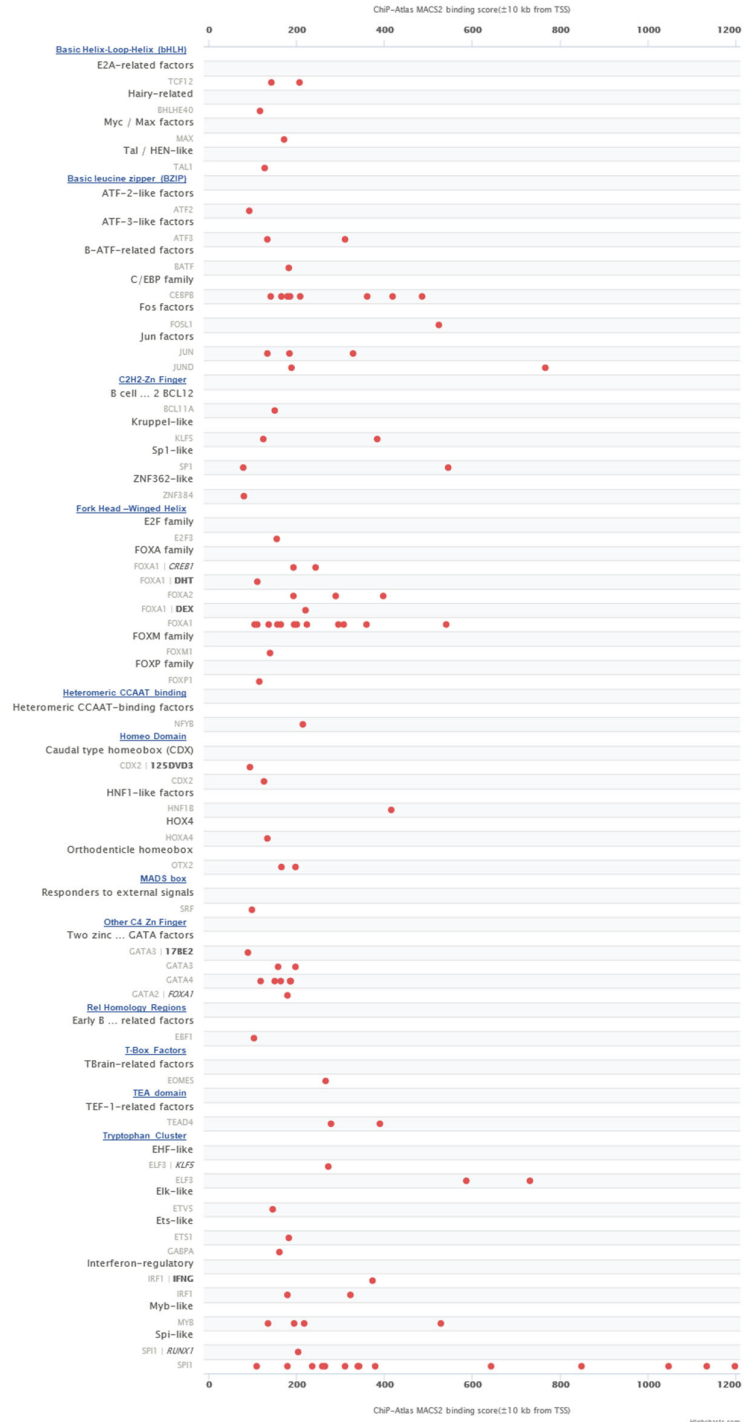

**Figure S5.** Whole Transcription Factors ChIP-seq binding-clusters, in gastro-intestinal cancer cells, within BCL2L15 regulatory region ( $\pm 10$ Kb from Transcription Starting Site, TSS). Binding score arbitrary units (from 0 to 1200). Highlighted blue: Transcription factor class, Black: Transcription factor subclass, Light grey: Transcription factor gene name. Each red dot is an independent ChIP-seq experiment and indicates the intersection between the specific transcription factor gene name and its relative binding score to the BCL2L15 regulatory region.

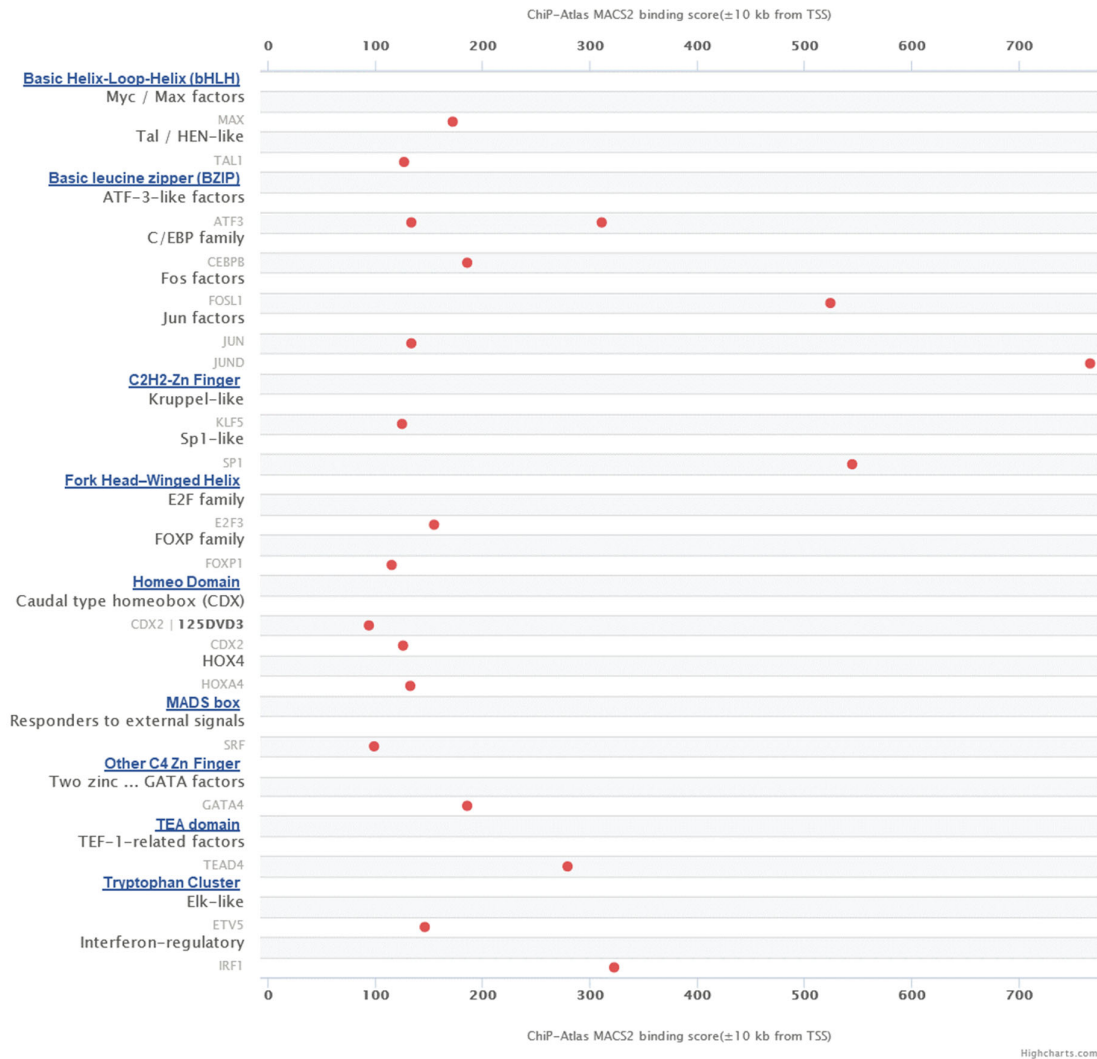

**Figure S6.** Correlation plots between YY1 and BCL2L15 expression in twelve CRC GEO datasets. YY1 probe: YY1 200047\_s\_at; BCL2L15 probe: BCL2L15 236979\_at.

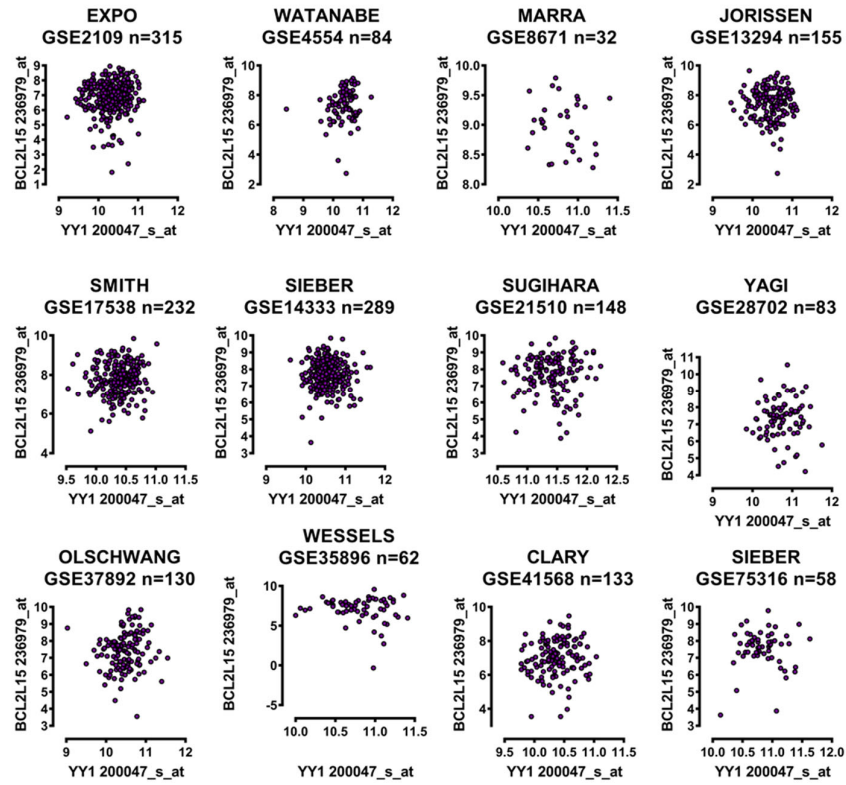

**Figure S7.** Correlation between YY1 expression and stratification of samples according to genetic mutational status in GSE35896. Dot plots with median of YY1 2log expression in CRC samples of: **A.** APC gene (WT vs. MUT). **B.** BRAF gene (WT vs. MUT). **C.** KRAS gene (WT vs. MUT). **D.** PIK3CA gene (WT vs. MUT). **E.** PTEN gene (WT vs. MUT). **F.** TP53 gene (WT vs. MUT). n.s.= not significant.

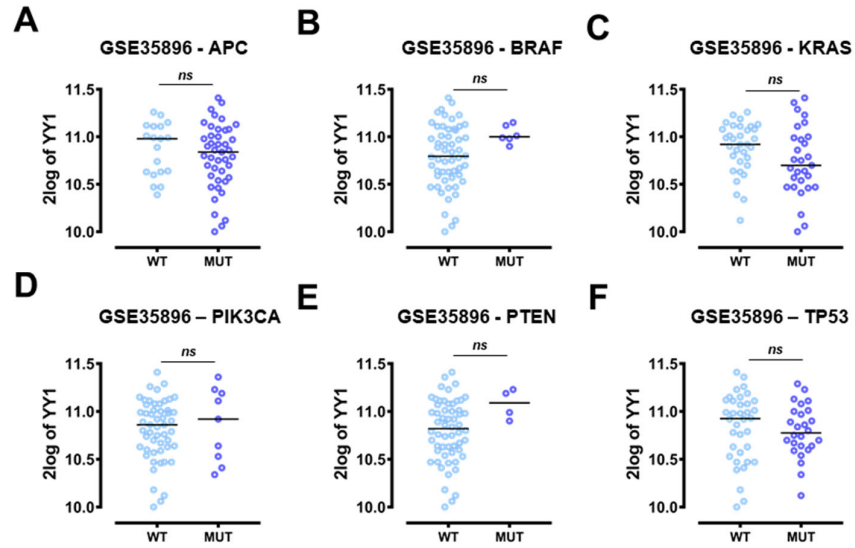

**Figure S8.** T-SNE plots of non-tumoral cells: YY1 and BCL2L15 expression. **A.** t-SNE plot of stromal cells (clusters). **B.** t-SNE plot of stromal cells (YY1 expression). **C.** t-SNE plot of stromal cells (BCL2L15 expression). **D.** t-SNE plot of myeloid cells (clusters). **E.** t-SNE plot of myeloid cells (YY1 expression). **F.** t-SNE plot of myeloid cells (BCL2L15 expression). **G.** t-SNE plot of T cells (clusters). **H.** t-SNE plot of T cells (YY1 expression). **I.** t-SNE plot of T cells (BCL2L15 expression). **J.** t-SNE plot of B cells (clusters). **K.** t-SNE plot of B cells (YY1 expression). **L.** t-SNE plot of B cells (BCL2L15 expression).

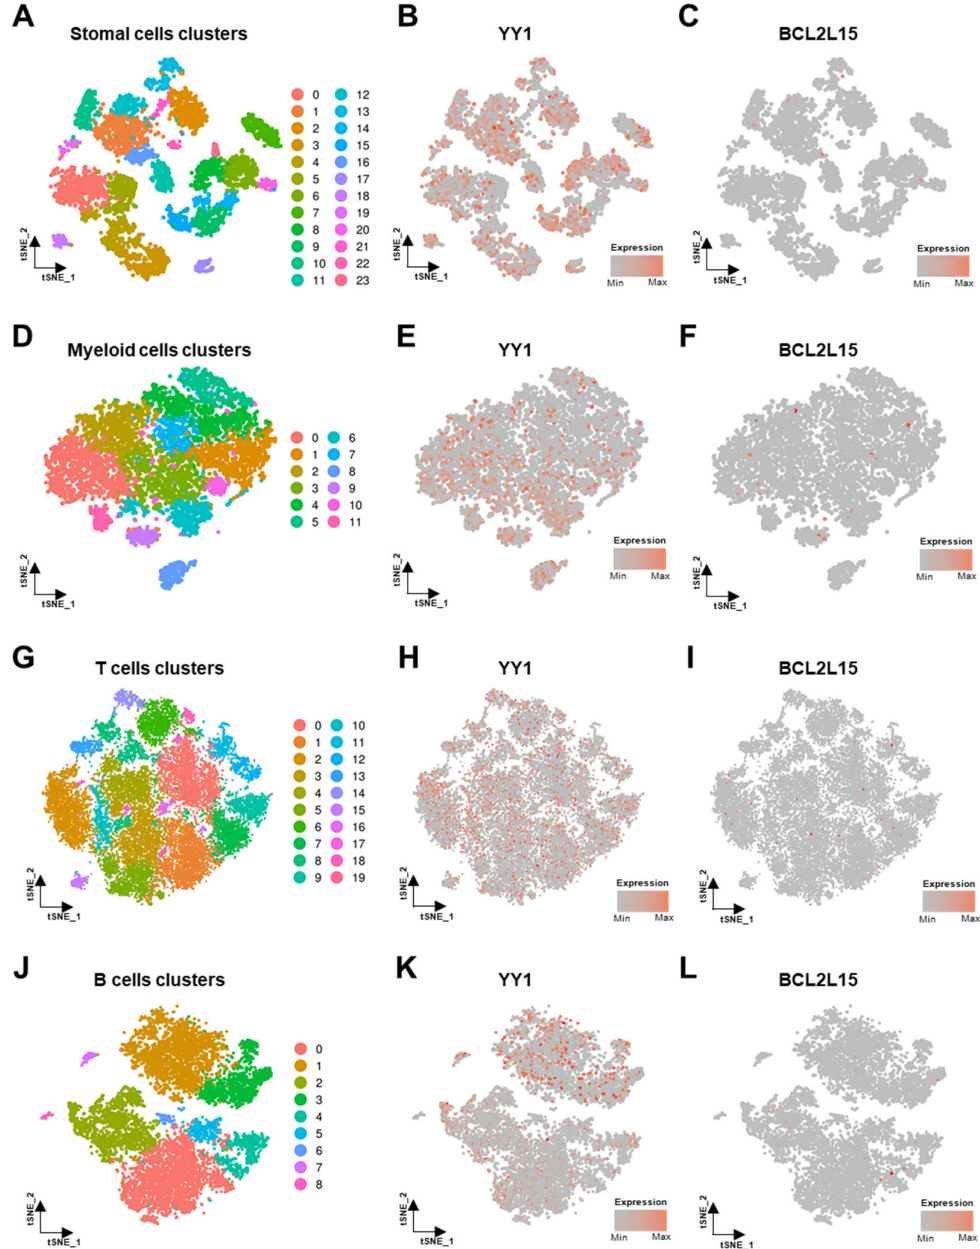



**Figure S9.** YY1 antibody mono-specificity. The YY1-mAb used for WB analyses selectively recognizes YY1 and not the homologous YY2. Flag-tagged human recombinant YY2 (hr-YY2) purified protein was loaded as control. Anti-FLAG antibody was used to detect hr-YY2.

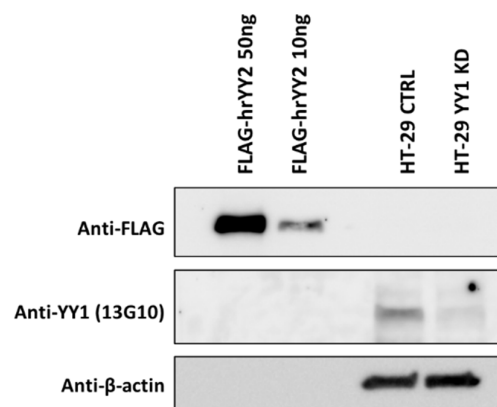

Supplement: s1 [file s1]
